# Supplementary material for: Viral RNA Degradation and Diffusion Act as a Bottleneck for the Influenza A Virus Infection Efficiency
Source: PubMed Central journal article supplement (PMC5079570; doi:10.1371/journal.pcbi.1005075), 2016-10-25
Supplement: pcbi.1005075.s001.pdf [file pcbi.1005075.s001.pdf]

| index | name                             | $\theta_{lb}$ | $\hat{\theta}$ | $\theta_{ub}$ | non-log $\hat{\theta}$ |
|-------|----------------------------------|---------------|----------------|---------------|------------------------|
| 1     | k_ATPase                         | -5            | -1.1001        | +3            | $+7.94 \cdot 10^{-02}$ |
| 2     | h                                | -5            | +0.2796        | +3            | $+1.90 \cdot 10^{+00}$ |
| 3     | h_WSN_H3_mut                     | -5            | +0.6285        | +3            | $+4.25 \cdot 10^{+00}$ |
| 4     | h_WSN_H3_wt                      | -5            | +0.3599        | +3            | $+2.29 \cdot 10^{+00}$ |
| 5     | init_Endosomes_FDQ               | -5            | -4.8812        | +3            | $+1.31 \cdot 10^{-05}$ |
| 6     | init_VirRec_end_140807           | -5            | -2.1374        | +3            | $+7.29 \cdot 10^{-03}$ |
| 7     | init_VirRec_end_140822           | -5            | -1.1345        | +3            | $+7.34 \cdot 10^{-02}$ |
| 8     | init_VirRec_end_150604           | -5            | -0.5521        | +3            | $+2.80 \cdot 10^{-01}$ |
| 9     | init_VirRec_end_150612           | -5            | -3.6796        | +3            | $+2.09 \cdot 10^{-04}$ |
| 10    | init_Virus_number_X31            | -5            | +0.5787        | +3            | $+3.79 \cdot 10^{+00}$ |
| 11    | init_Virus_number_X31_nuclear_NP | -5            | +0.7553        | +3            | $+5.69 \cdot 10^{+00}$ |
| 12    | init_Virus_number_X31_pH_end     | -5            | -4.3996        | +3            | $+3.98 \cdot 10^{-05}$ |
| 13    | k_Hplus                          | -7            | -5.3133        | +3            | $+4.86 \cdot 10^{-06}$ |
| 14    | k_Hplus_WSN_H3_mut               | -7            | -5.6787        | +3            | $+2.10 \cdot 10^{-06}$ |
| 15    | k_Hplus_WSN_H3_wt                | -7            | -5.3621        | +3            | $+4.34 \cdot 10^{-06}$ |
| 16    | k_basal                          | -5            | -2.0345        | +3            | $+9.24 \cdot 10^{-03}$ |
| 17    | k_deg                            | -5            | -0.7242        | +3            | $+1.89 \cdot 10^{-01}$ |
| 18    | k_end                            | -5            | -1.0307        | +3            | $+9.32 \cdot 10^{-02}$ |
| 19    | k_fus                            | -5            | -0.4449        | +3            | $+3.59 \cdot 10^{-01}$ |
| 20    | k_imp                            | -5            | +4.0000        | +4            | $+1.00 \cdot 10^{+04}$ |
| 21    | k_inhib_100uM                    | -5            | -3.7360        | +3            | $+1.84 \cdot 10^{-04}$ |
| 22    | k_inhib_40uM                     | -5            | +3.9953        | +4            | $+9.89 \cdot 10^{+03}$ |
| 23    | k_tau                            | -5            | +0.0821        | +3            | $+1.21 \cdot 10^{+00}$ |
| 24    | offset_Fus_DiL_DiO               | -5            | -0.4321        | +3            | $+3.70 \cdot 10^{-01}$ |
| 25    | offset_Fus_R18                   | -5            | -1.2652        | +3            | $+5.43 \cdot 10^{-02}$ |
| 26    | offset_NP                        | -5            | -0.2488        | +3            | $+5.64 \cdot 10^{-01}$ |
| 27    | offset_vRNP_140807               | -5            | -2.4147        | +3            | $+3.85 \cdot 10^{-03}$ |
| 28    | offset_vRNP_140822               | -5            | -2.4716        | +3            | $+3.38 \cdot 10^{-03}$ |
| 29    | offset_vRNP_150604               | -5            | -3.0353        | +3            | $+9.22 \cdot 10^{-04}$ |
| 30    | offset_vRNP_150612               | -5            | -3.1259        | +3            | $+7.48 \cdot 10^{-04}$ |
| 31    | pH_lb                            | -5            | +0.6498        | +3            | $+4.46 \cdot 10^{+00}$ |
| 32    | pH_ub                            | -5            | +0.7926        | +3            | $+6.20 \cdot 10^{+00}$ |
| 33    | scale_Fus_DiL_DiO                | -5            | -0.4557        | +3            | $+3.50 \cdot 10^{-01}$ |
| 34    | scale_Fus_R18                    | -5            | -0.3111        | +3            | $+4.89 \cdot 10^{-01}$ |
| 35    | scale_NP                         | -5            | -0.8445        | +3            | $+1.43 \cdot 10^{-01}$ |
| 36    | scale_pH                         | -5            | -0.7445        | +3            | $+1.80 \cdot 10^{-01}$ |
| 37    | scale_vRNP_140807                | -5            | +0.0996        | +3            | $+1.26 \cdot 10^{+00}$ |
| 38    | scale_vRNP_140822                | -5            | -0.8552        | +3            | $+1.40 \cdot 10^{-01}$ |
| 39    | scale_vRNP_150604                | -5            | -2.7923        | +3            | $+1.61 \cdot 10^{-03}$ |
| 40    | scale_vRNP_150612                | -5            | +1.0336        | +3            | $+1.08 \cdot 10^{+01}$ |
| 41    | sd_FDQ_H3_mut                    | -5            | -1.2285        | +3            | $+5.91 \cdot 10^{-02}$ |
| 42    | sd_FDQ_H3_mut_rel                | -5            | -1.0824        | +3            | $+8.27 \cdot 10^{-02}$ |
| 43    | sd_FDQ_WSN_H3_wt                 | -5            | -1.1098        | +3            | $+7.77 \cdot 10^{-02}$ |
| 44    | sd_FDQ_WSN_H3_wt_rel             | -5            | -1.4075        | +3            | $+3.91 \cdot 10^{-02}$ |
| 45    | sd_FDQ_X31                       | -5            | -1.8986        | +3            | $+1.26 \cdot 10^{-02}$ |
| 46    | sd_FDQ_X31_rel                   | -5            | -0.8759        | +3            | $+1.33 \cdot 10^{-01}$ |
| 47    | sd_Fus_DiL_DiO                   | -5            | -1.5136        | +3            | $+3.06 \cdot 10^{-02}$ |
| 48    | sd_Fus_R18                       | -5            | -1.2216        | +3            | $+6.00 \cdot 10^{-02}$ |
| 49    | sd_NP                            | -5            | -1.5560        | +3            | $+2.78 \cdot 10^{-02}$ |
| 50    | sd_pH_MDCK                       | -5            | -1.5457        | +3            | $+2.85 \cdot 10^{-02}$ |
| 51    | sd_vRNP_140807                   | -5            | -1.1650        | +3            | $+6.84 \cdot 10^{-02}$ |
| 52    | sd_vRNP_140822                   | -5            | -1.1602        | +3            | $+6.91 \cdot 10^{-02}$ |
| 53    | sd_vRNP_150604                   | -5            | -0.6037        | +3            | $+2.49 \cdot 10^{-01}$ |
| 54    | sd_vRNP_150612                   | -5            | -1.0648        | +3            | $+8.61 \cdot 10^{-02}$ |
| 55    | sd_vRNP_tot_140807               | -5            | -1.6770        | +3            | $+2.10 \cdot 10^{-02}$ |
| 56    | sd_vRNP_tot_140822               | -5            | -0.3950        | +3            | $+4.03 \cdot 10^{-01}$ |
| 57    | sd_vRNP_tot_150604               | -5            | -0.9325        | +3            | $+1.17 \cdot 10^{-01}$ |
| 58    | sd_vRNP_tot_150612               | -5            | -0.9742        | +3            | $+1.06 \cdot 10^{-01}$ |

**S1 Table: Estimated parameter values.**  $\hat{\theta}$  indicates the estimated value of the parameters.  $\theta_{lb}$  and  $\theta_{ub}$  indicate the lower and upper bounds imposed during optimization. The non-log-column indicates the non-logarithmic value of the estimate. Parameters highlighted in red color indicate parameter values close to their bounds.
